# Supplementary figures and images for: In situ probing of the crystallization kinetics of rr-P3HT on single layer graphene as a function of temperature
Source: Royal Society of Chemistry journal article supplement (doi:10.1039/c6cp08589j), 2017-01-01

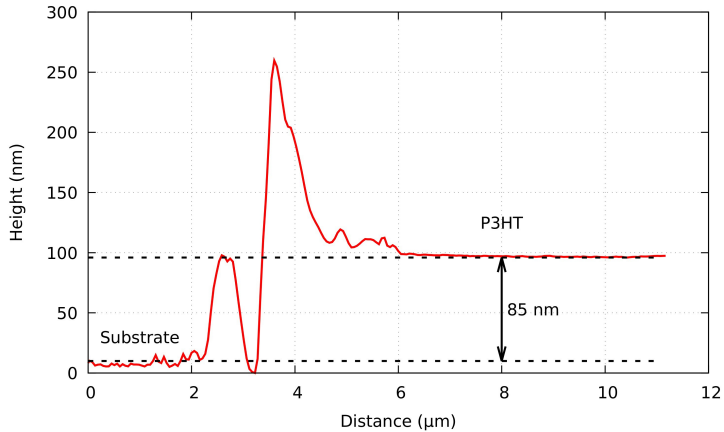

Supplement: c6cp08589j1.pdf [file c6cp08589j1.pdf]

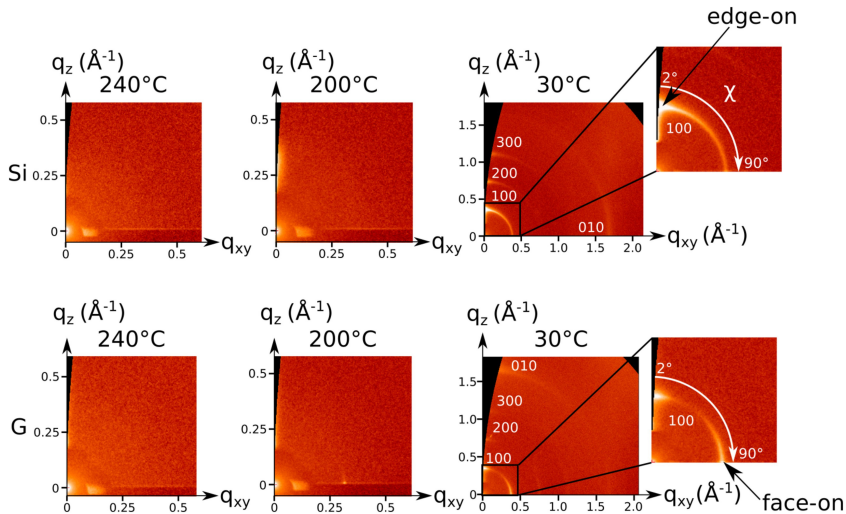

Supplement: c6cp08589j2.pdf [file c6cp08589j2.pdf]

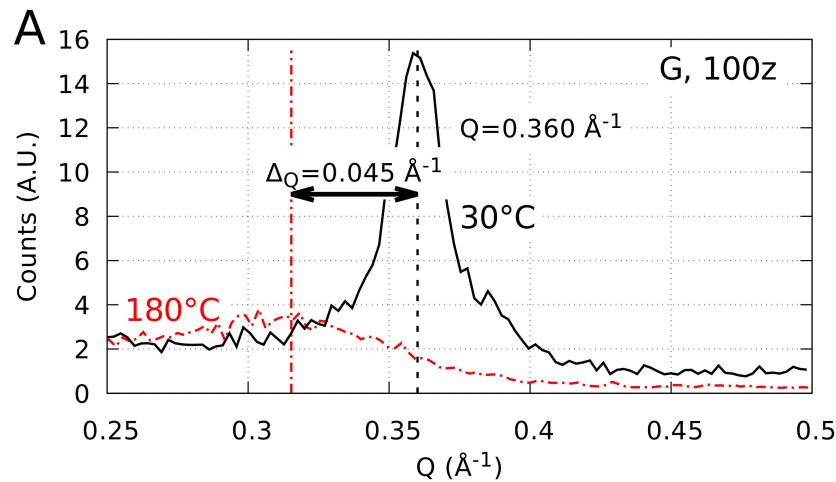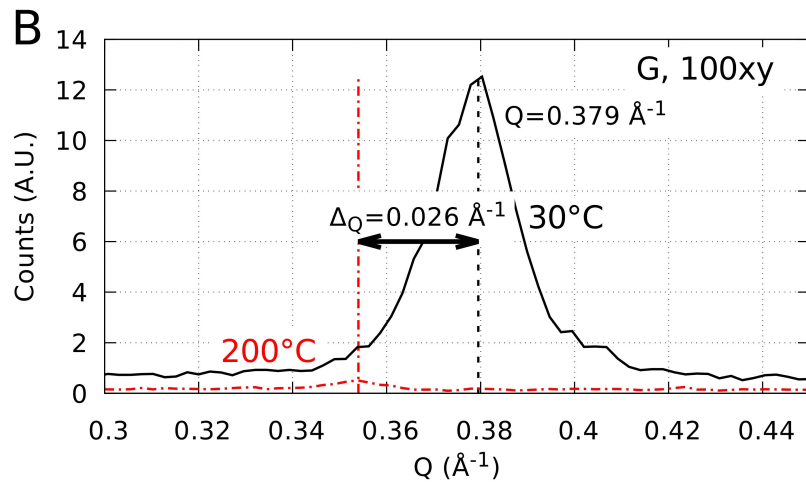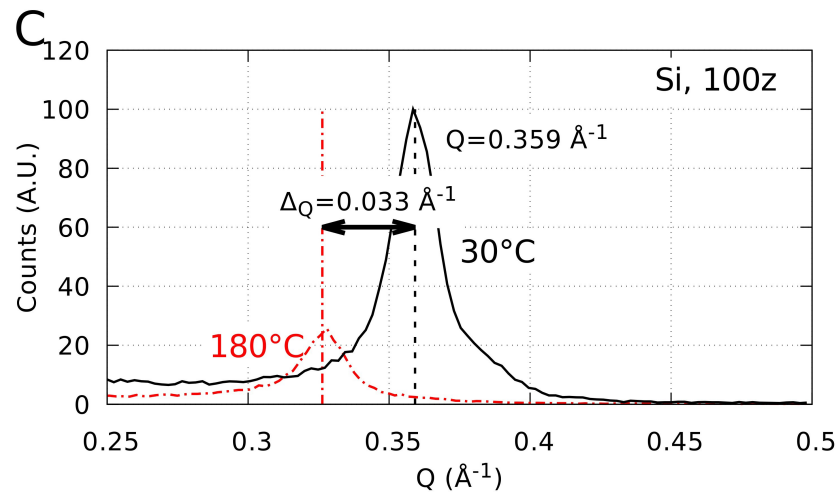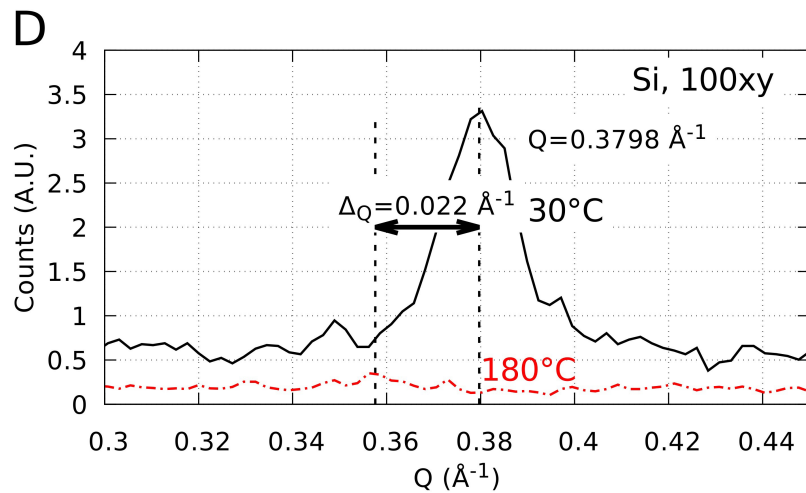

Supplement: c6cp08589j3.pdf [file c6cp08589j3.pdf]
